# Supplementary material for: Porous Pt–NiOx nanostructures with ultrasmall building blocks and enhanced electrocatalytic activity for the ethanol oxidation reaction
Source: Royal Society of Chemistry journal article supplement (doi:10.1039/c7ra11575j), 2018-01-01
Supplement: c7ra11575j1.pdf [file c7ra11575j1.pdf]

## Electronic Supplementary Information

### Porous Pt-NiO<sub>x</sub> Nanostructure with Ultrasmall Building Blocks and Enhanced Electrocatalytic Activity for Ethanol Oxidation Reaction

Bangquan Li,<sup>a, b</sup> Hongsheng Fan,<sup>a</sup> Ming Cheng,<sup>a</sup> Yuanjun Song,<sup>c</sup> Fangtao Li,<sup>c</sup> Xiaodan Wang,<sup>c</sup> and Rongming Wang\*<sup>c</sup>

<sup>a</sup>Department of Physics, Beihang University, Beijing 100191, China

<sup>b</sup>Institute of Solid State Physics, Shanxi Datong University, Datong 037009, China

<sup>c</sup>Beijing Key Laboratory for Magneto-Photoelectrical Composite and Interface Science, School of Mathematics and Physics, University of Science and Technology Beijing, Beijing 100083, China

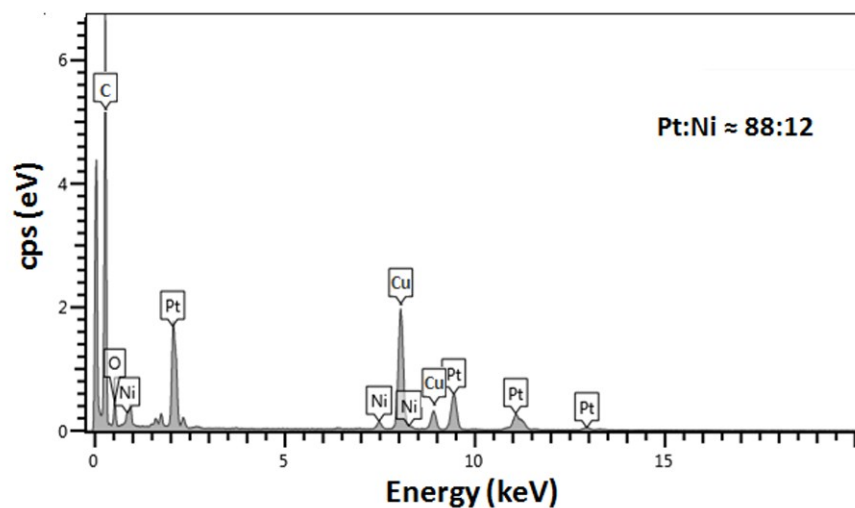

Fig. S1 EDS spectrum of Pt-NiO<sub>x</sub>/C.

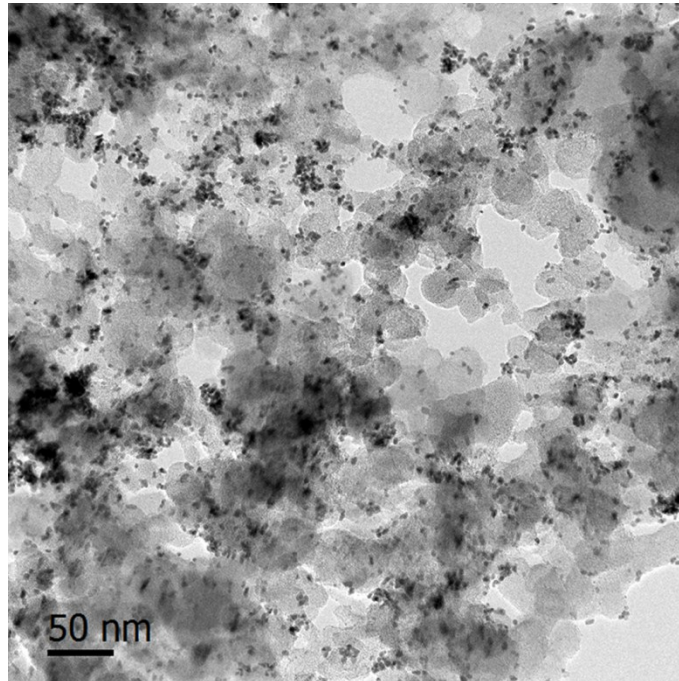

Fig. S2 A representative TEM image of the home-made Pt/C structure.

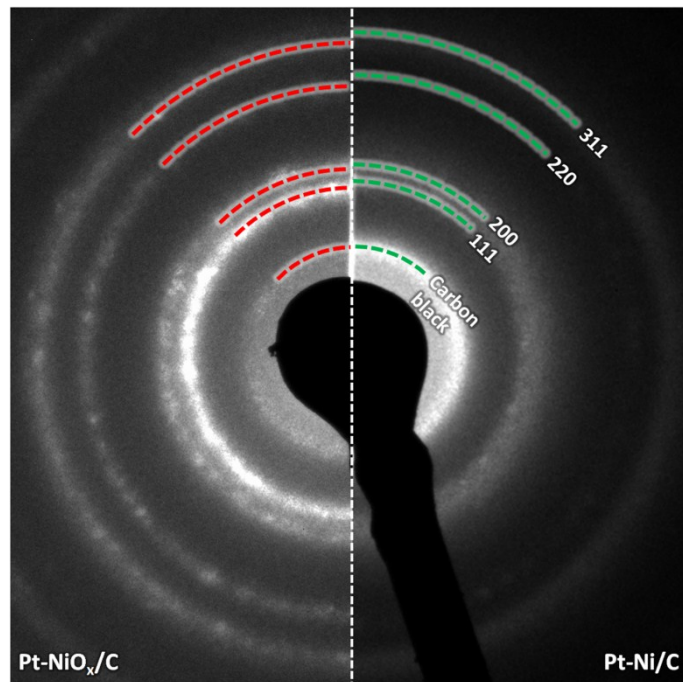

Fig. S3 A comparison of SAED patterns of Pt-NiO<sub>x</sub>/C and Pt-Ni/C. The dashed lines show the diffraction rings of carbon black and fcc crystalline structures.

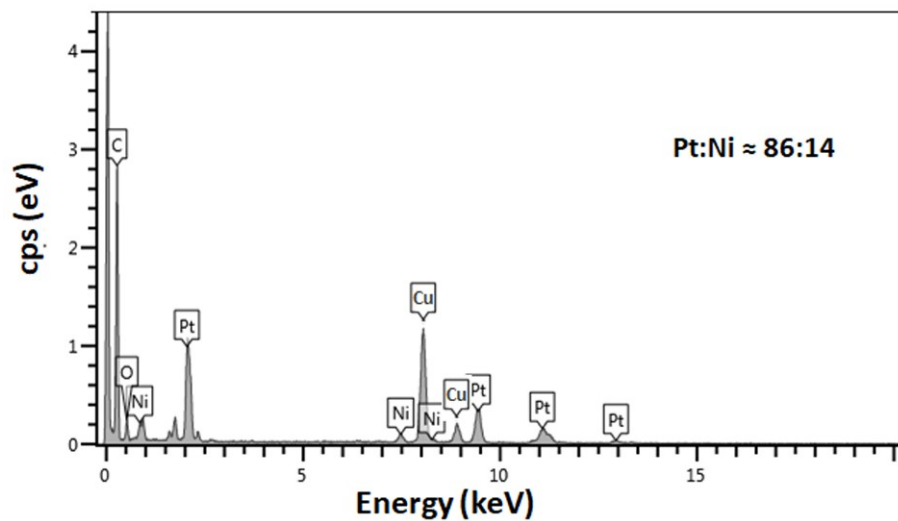

Fig. S4 EDS spectrum of Pt-Ni/C.

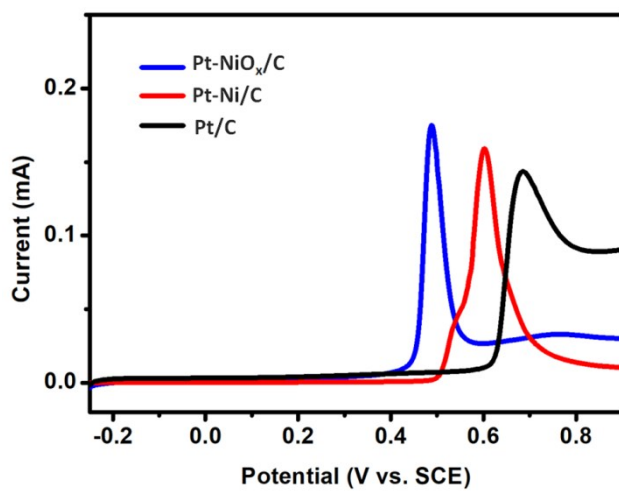

Fig. S5 CO-stripping profiles of Pt-NiO<sub>x</sub>/C, Pt-Ni/C and Pt/C catalysts at 20 mV·s<sup>-1</sup> in an aqueous solution of 0.5 M H<sub>2</sub>SO<sub>4</sub>.
